# Supplementary material
Source: publisher figshare collection journal article supplement (https://karger.figshare.com/articles/dataset/_/25038494)
Supplement: Supplementary file 1 [file 1]

Table S2. ATP yield per harvest timepoint

| $\frac{1}{2}OD_{max}$ | ATP yield<br>[mM mM <sub>s</sub> <sup>-1</sup> ]   |       | normalized ATP yield<br>[mM mM <sub>cc</sub> <sup>-1</sup> ] |      |
|-----------------------|----------------------------------------------------|-------|--------------------------------------------------------------|------|
| Substrate             | coupling ratio [H <sup>+</sup> ATP <sup>-1</sup> ] |       | coupling ratio [H <sup>+</sup> ATP <sup>-1</sup> ]           |      |
|                       | 3.3                                                | 4.3   | 3.3                                                          | 4.3  |
| Glucose               | 1.92                                               | 1.79  | 0.32                                                         | 0.30 |
| Galactose             | 0.76                                               | 0.73  | 0.13                                                         | 0.12 |
| Fructose              | 1.72                                               | 1.62  | 0.29                                                         | 0.27 |
| Mannose               | 1.33                                               | 1.24  | 0.22                                                         | 0.21 |
| Rhamnose              | 1.88                                               | 1.76  | 0.31                                                         | 0.29 |
| Fucose                | 1.46                                               | 1.40  | 0.24                                                         | 0.23 |
| Glucuronate           | 3.47                                               | 3.17  | 0.58                                                         | 0.53 |
| Arabinose             | 2.10                                               | 1.95  | 0.42                                                         | 0.39 |
| Xylose                | 1.94                                               | 1.86  | 0.39                                                         | 0.36 |
| Maltose               | 3.48                                               | 3.20  | 0.28                                                         | 0.27 |
| Lactose               | 5.48                                               | 5.12  | 0.46                                                         | 0.43 |
| Sucrose               | 6.35                                               | 5.92  | 0.53                                                         | 0.49 |
| α-Cyclodextrin        | 9.26                                               | 8.71  | 0.26                                                         | 0.24 |
| Xylan                 | 19.75                                              | 18.35 | 0.56                                                         | 0.52 |

| $\frac{1}{2}OD_{max}$ | ATP yield<br>[mM mM <sub>s</sub> <sup>-1</sup> ]   |       | normalized ATP yield<br>[mM mM <sub>cc</sub> <sup>-1</sup> ] |      |
|-----------------------|----------------------------------------------------|-------|--------------------------------------------------------------|------|
| Substrate             | coupling ratio [H <sup>+</sup> ATP <sup>-1</sup> ] |       | coupling ratio [H <sup>+</sup> ATP <sup>-1</sup> ]           |      |
|                       | 3.3                                                | 4.3   | 3.3                                                          | 4.3  |
| Glucose               | 1.87                                               | 1.74  | 0.31                                                         | 0.29 |
| Galactose             | 1.49                                               | 1.41  | 0.25                                                         | 0.24 |
| Fructose              | 2.20                                               | 2.06  | 0.37                                                         | 0.34 |
| Mannose               | 2.07                                               | 1.93  | 0.35                                                         | 0.32 |
| Rhamnose              | 1.25                                               | 1.16  | 0.21                                                         | 0.19 |
| Fucose                | 1.65                                               | 1.58  | 0.28                                                         | 0.26 |
| Glucuronate           | 3.59                                               | 3.28  | 0.60                                                         | 0.55 |
| Arabinose             | 2.31                                               | 2.15  | 0.46                                                         | 0.43 |
| Xylose                | 1.69                                               | 1.57  | 0.34                                                         | 0.31 |
| Maltose               | 3.65                                               | 3.44  | 0.30                                                         | 0.29 |
| Lactose               | 4.94                                               | 4.60  | 0.41                                                         | 0.38 |
| Sucrose               | 6.05                                               | 5.65  | 0.50                                                         | 0.47 |
| α-Cyclodextrin        | 13.72                                              | 12.88 | 0.38                                                         | 0.52 |
| Xylan                 | 19.59                                              | 18.31 | 0.60                                                         | 0.55 |

| $\frac{3}{4}OD_{max}$ | ATP yield<br>[mM mM <sub>s</sub> <sup>-1</sup> ]   |       | normalized ATP yield<br>[mM mM <sub>cc</sub> <sup>-1</sup> ] |      |
|-----------------------|----------------------------------------------------|-------|--------------------------------------------------------------|------|
| Substrate             | coupling ratio [H <sup>+</sup> ATP <sup>-1</sup> ] |       | coupling ratio [H <sup>+</sup> ATP <sup>-1</sup> ]           |      |
|                       | 3.3                                                | 4.3   | 3.3                                                          | 4.3  |
| Glucose               | 1.91                                               | 1.77  | 0.32                                                         | 0.30 |
| Galactose             | 1.67                                               | 1.58  | 0.28                                                         | 0.26 |
| Fructose              | 2.34                                               | 2.18  | 0.39                                                         | 0.36 |
| Mannose               | 2.14                                               | 2.00  | 0.36                                                         | 0.33 |
| Rhamnose              | 1.16                                               | 1.07  | 0.19                                                         | 0.18 |
| Fucose                | 1.71                                               | 1.63  | 0.28                                                         | 0.27 |
| Glucuronate           | 3.67                                               | 3.36  | 0.61                                                         | 0.56 |
| Arabinose             | 1.87                                               | 1.73  | 0.37                                                         | 0.35 |
| Xylose                | 1.76                                               | 1.63  | 0.35                                                         | 0.33 |
| Maltose               | 2.97                                               | 2.78  | 0.25                                                         | 0.23 |
| Lactose               | 5.18                                               | 4.83  | 0.43                                                         | 0.40 |
| Sucrose               | 6.06                                               | 5.65  | 0.51                                                         | 0.47 |
| α-Cyclodextrin        | 14.56                                              | 13.67 | 0.40                                                         | 0.38 |
| Xylan                 | 19.93                                              | 18.69 | 0.57                                                         | 0.53 |

| $OD_{max}$     | ATP yield<br>[mM mM <sub>s</sub> <sup>-1</sup> ]   |       | normalized ATP yield<br>[mM mM <sub>cc</sub> <sup>-1</sup> ] |      |
|----------------|----------------------------------------------------|-------|--------------------------------------------------------------|------|
| Substrate      | coupling ratio [H <sup>+</sup> ATP <sup>-1</sup> ] |       | coupling ratio [H <sup>+</sup> ATP <sup>-1</sup> ]           |      |
|                | 3.3                                                | 4.3   | 3.3                                                          | 4.3  |
| Glucose        | 2.06                                               | 1.91  | 0.34                                                         | 0.32 |
| Galactose      | 1.73                                               | 1.61  | 0.29                                                         | 0.27 |
| Fructose       | 2.26                                               | 2.10  | 0.38                                                         | 0.35 |
| Mannose        | 1.94                                               | 1.81  | 0.32                                                         | 0.30 |
| Rhamnose       | 1.25                                               | 1.15  | 0.21                                                         | 0.19 |
| Fucose         | 1.86                                               | 1.77  | 0.31                                                         | 0.29 |
| Glucuronate    | 3.37                                               | 3.08  | 0.56                                                         | 0.51 |
| Arabinose      | 2.11                                               | 1.96  | 0.42                                                         | 0.39 |
| Xylose         | 1.91                                               | 1.77  | 0.38                                                         | 0.35 |
| Maltose        | 3.48                                               | 3.25  | 0.29                                                         | 0.27 |
| Lactose        | 4.63                                               | 4.30  | 0.39                                                         | 0.36 |
| Sucrose        | 5.46                                               | 5.09  | 0.45                                                         | 0.42 |
| α-Cyclodextrin | 16.46                                              | 15.47 | 0.46                                                         | 0.43 |
| Xylan          | 19.77                                              | 18.71 | 0.56                                                         | 0.53 |
