# Supplementary material
Source: publisher figshare collection journal article supplement (https://karger.figshare.com/articles/dataset/_/25038494)
Supplement: Supplementary file 2 [file 1]

Table S3. Peptide count of substrate-related transporter

| Locus tag   | Gene name    | Predicted function                             | Substrate used for adaptation <sup>a</sup> |     |     |     |     |     |      |     |     |     |     |     |      |     |  |
|-------------|--------------|------------------------------------------------|--------------------------------------------|-----|-----|-----|-----|-----|------|-----|-----|-----|-----|-----|------|-----|--|
|             |              |                                                | Glc                                        | Gal | Frc | Man | Rha | Fuc | GlcA | Ara | Xyl | Mal | Lac | Suc | αCyc | Xln |  |
| BVU_RS01815 | <i>glcU</i>  | Glucose transporter (GRP)                      | -                                          | -   | -   | -   | -   | -   | -    | -   | -   | -   | -   | -   | -    | -   |  |
| BVU_RS11700 | <i>glcT</i>  | Glucose/galactose transporter (MFS)            | -                                          | -   | -   | -   | -   | -   | -    | -   | -   | -   | -   | -   | -    | -   |  |
| BVU_RS08460 | <i>fruP</i>  | Glucose/galactose transporter (MFS)            | -                                          | -   | 3   | -   | -   | -   | -    | -   | -   | -   | -   | -   | -    | -   |  |
| BVU_RS06945 | <i>fucP1</i> | L-Fucose:H <sup>+</sup> symporter              | -                                          | -   | -   | -   | -   | 12  | -    | -   | -   | -   | -   | -   | -    | 2   |  |
| BVU_RS01125 | <i>fucP2</i> | L-Fucose:H <sup>+</sup> symporter              | -                                          | -   | -   | -   | -   | -   | -    | -   | -   | -   | -   | -   | -    | -   |  |
| BVU_RS13120 | <i>fucP3</i> | Fucose transporter (MFS)                       | -                                          | -   | -   | -   | -   | -   | -    | -   | -   | -   | -   | -   | -    | -   |  |
| BVU_RS03030 | <i>rhaT</i>  | L-Rhamnose:H <sup>+</sup> symporter            | -                                          | -   | -   | -   | -   | -   | -    | -   | -   | -   | -   | -   | -    | -   |  |
| BVU_RS20420 | <i>xylE1</i> | D-Xylose transporter                           | -                                          | -   | -   | -   | -   | -   | -    | -   | -   | -   | -   | -   | -    | 15  |  |
| BVU_RS03810 | <i>xylE2</i> | Xylose:H <sup>+</sup> symporter (MFS)          | -                                          | -   | -   | -   | -   | -   | -    | -   | -   | -   | -   | -   | -    | -   |  |
| BVU_RS06840 | <i>araJ</i>  | Arabinose permease                             | -                                          | -   | -   | -   | -   | -   | -    | -   | -   | -   | -   | -   | -    | -   |  |
| BVU_RS11685 | <i>araP</i>  | Arabinose:Na <sup>+</sup> symporter            | -                                          | -   | -   | -   | -   | -   | 22   | -   | -   | -   | -   | -   | -    | 37  |  |
| BVU_RS09105 | <i>hexT</i>  | Glucuronate transporter                        | -                                          | -   | -   | -   | -   | -   | -    | -   | -   | -   | -   | -   | -    | -   |  |
| BVU_RS07015 | <i>malP</i>  | Maltose/maltooligosaccharide transporter (MFS) | -                                          | -   | -   | -   | -   | -   | -    | -   | -   | -   | -   | -   | -    | -   |  |
| BVU_RS13155 | <i>lacY</i>  | Lactose permease                               | -                                          | -   | -   | -   | -   | -   | -    | -   | -   | -   | -   | -   | -    | -   |  |
| BVU_RS00225 | <i>xynT</i>  | Xylooligosaccharide:cation symporter           | -                                          | -   | -   | -   | -   | -   | -    | -   | -   | -   | -   | -   | -    | 77  |  |
| BVU_RS19895 |              | Polysaccharidephosphate transport system (ABC) | -                                          | -   | -   | -   | -   | -   | -    | -   | -   | -   | -   | -   | -    | -   |  |
| BVU_RS07015 |              | Sugar transporter (MFS)                        | -                                          | -   | -   | -   | -   | -   | -    | -   | -   | -   | -   | -   | -    | -   |  |
| BVU_RS19525 |              | Putative sugar transporter (MFS)               | -                                          | -   | -   | -   | -   | -   | -    | -   | -   | -   | -   | -   | -    | -   |  |
| BVU_RS13825 |              | Putative sugar transporter (MFS)               | -                                          | -   | -   | -   | -   | -   | -    | -   | -   | -   | -   | -   | -    | -   |  |

<sup>a</sup> given numbers indicate peptide counts of identified proteins
