# Supplementary material
Source: publisher figshare collection journal article supplement (https://karger.figshare.com/articles/dataset/_/25038494)
Supplement: Supplementary file 3 [file 1]

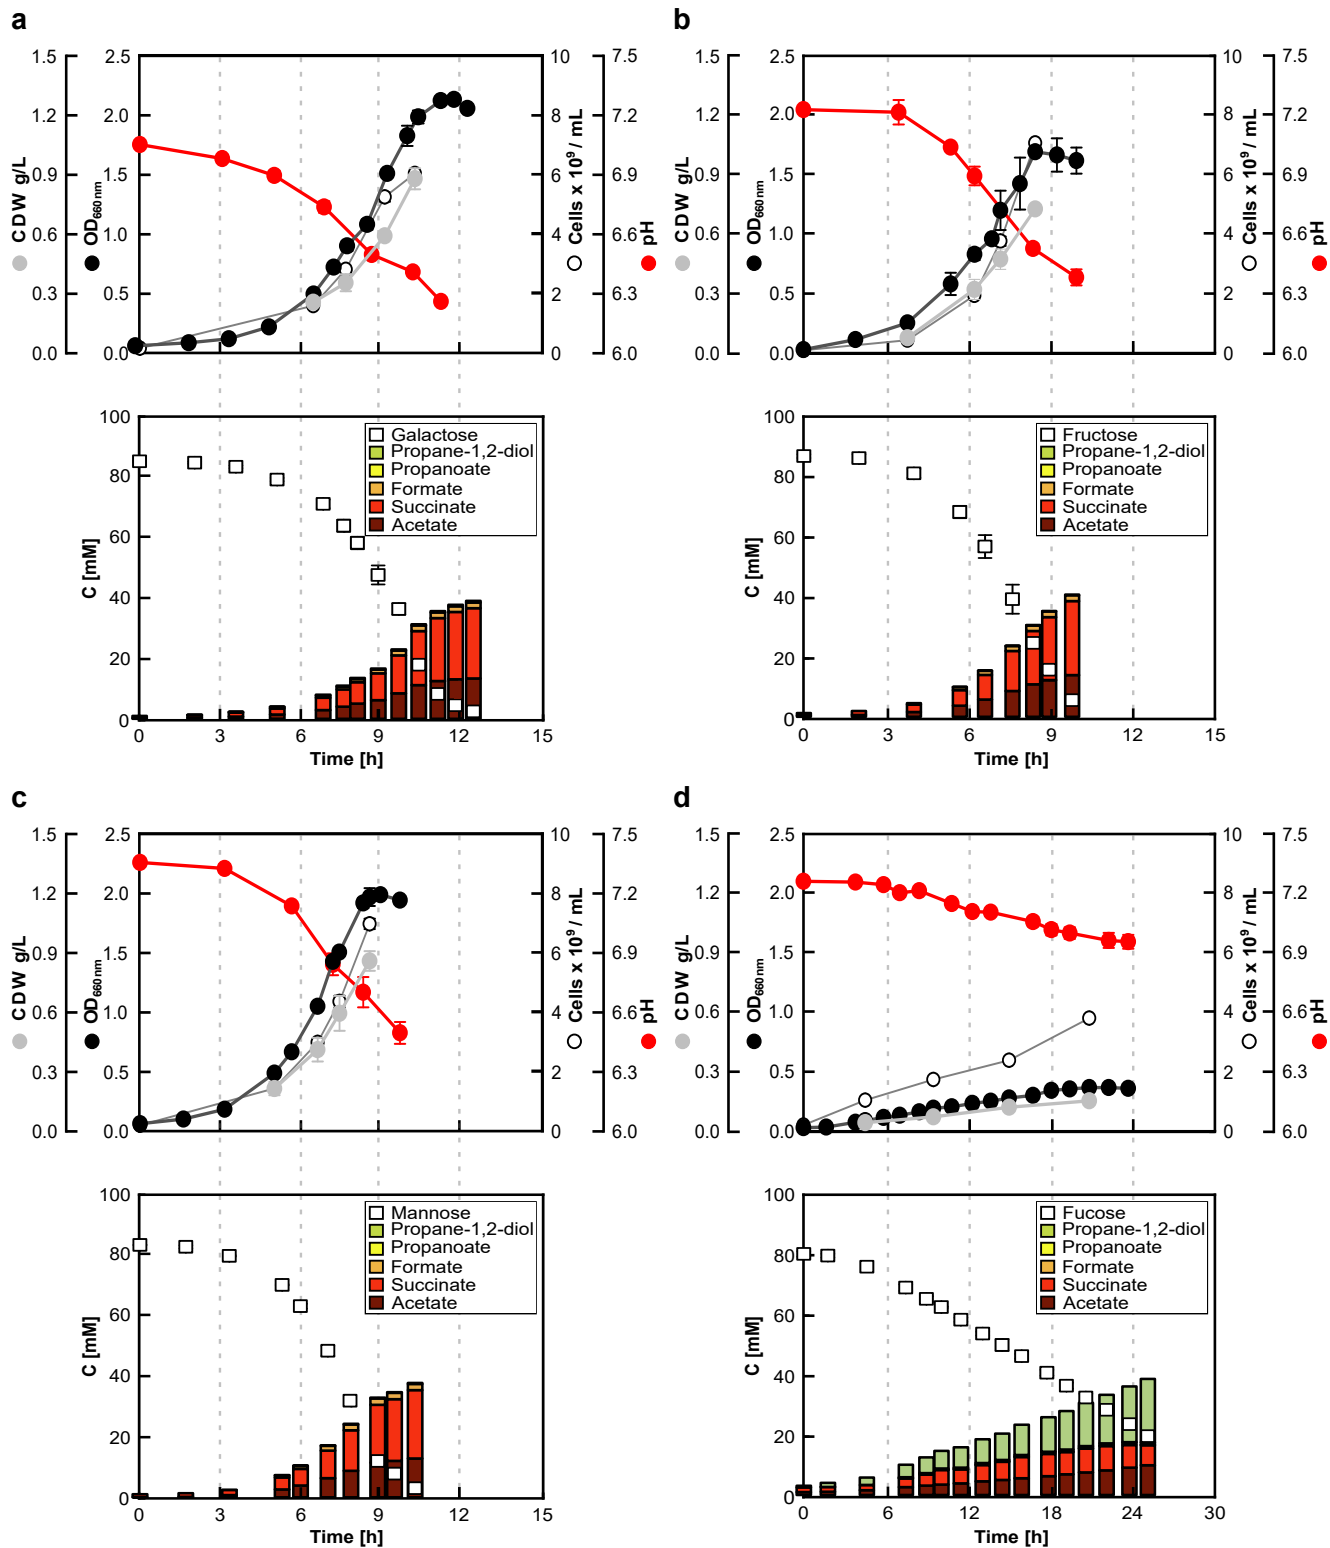

**e**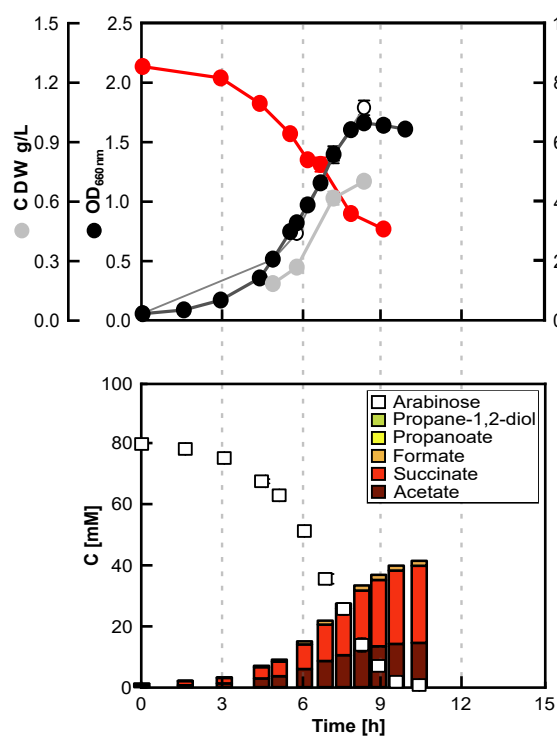**f**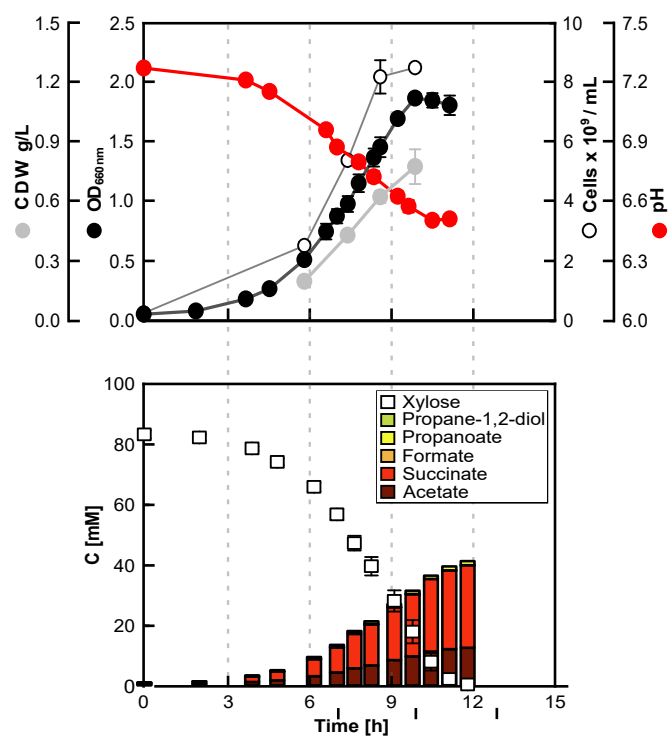**g**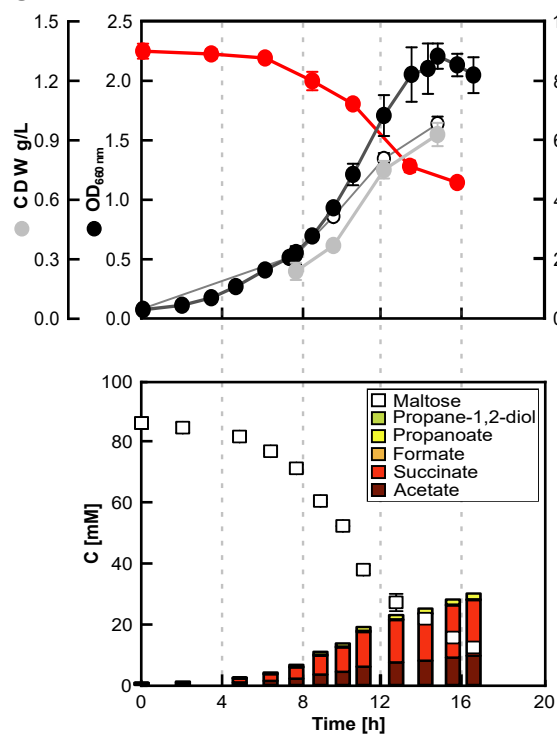**h**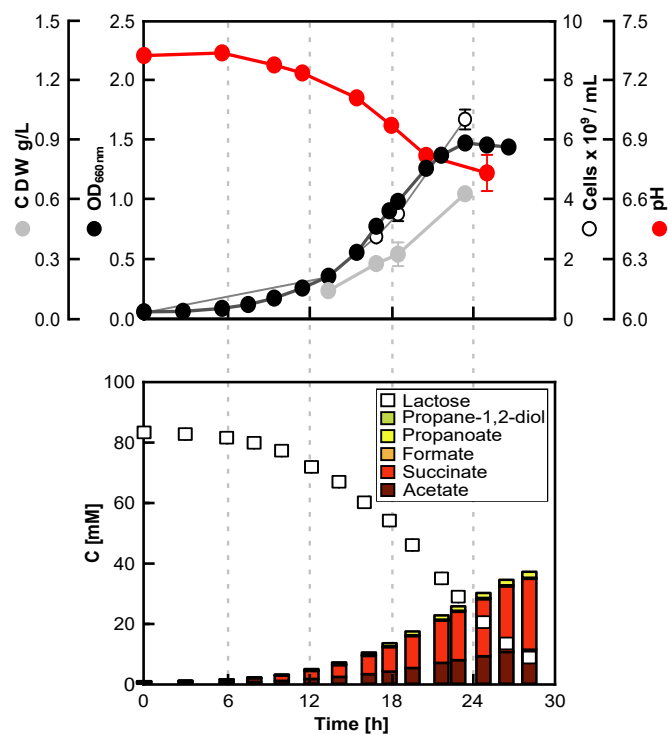

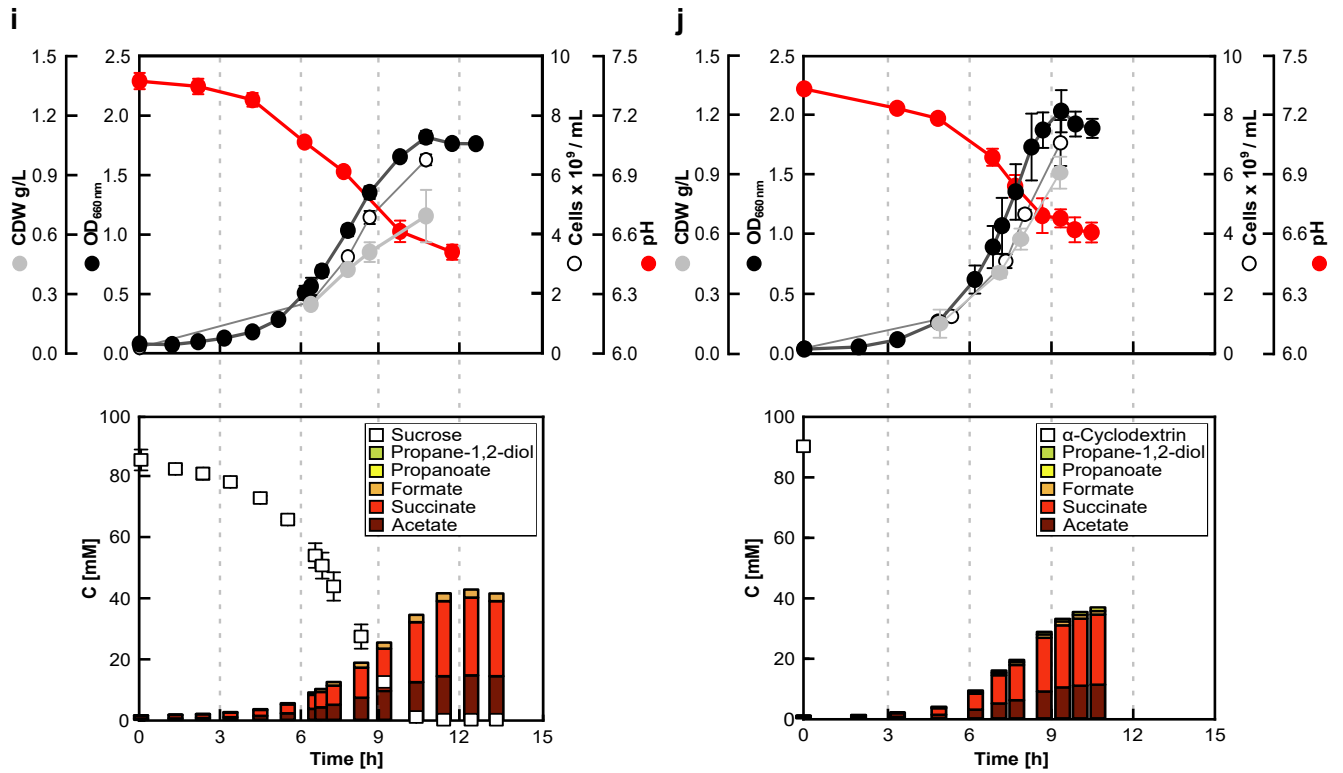

**Fig. S1.** Anaerobic growth performance of *P. vulgatus* with ten selected substrates. **a** Galactose. **b** Fructose. **c** Mannose. **d** Fucose. **e** Arabinose. **f** Xylose. **g** Maltose. **h** Lactose. **i** Sucrose. **j**  $\alpha$ -Cyclodextrin. The upper panels display monitored growth parameters, i.e. optical density (OD), total cell numbers (cells), cellular dry weight (CDW), and pH. The lower panels present the profiles of substrate depletion and fermentation product formation (compounds indicated in the insert) as determined by HPLC-analysis; compound concentrations are denoted as mM<sub>Carbon</sub> (mM<sub>C</sub>) to consider the different carbon content of the studied substrates.
