# Supplementary material
Source: publisher figshare collection journal article supplement (https://karger.figshare.com/articles/dataset/_/25038494)

|      |      |  |
|------|------|--|
| Ara  | Glc  |  |
| Xyl  | Gal  |  |
| Mal  | Fru  |  |
| Lac  | Man  |  |
| Sac  | Rha  |  |
| dCyc | Fuc  |  |
| Xin  | GlcA |  |

  

|       |
|-------|
| n.d.  |
| 12.5  |
| 25.0  |
| 37.5  |
| ≥50.0 |

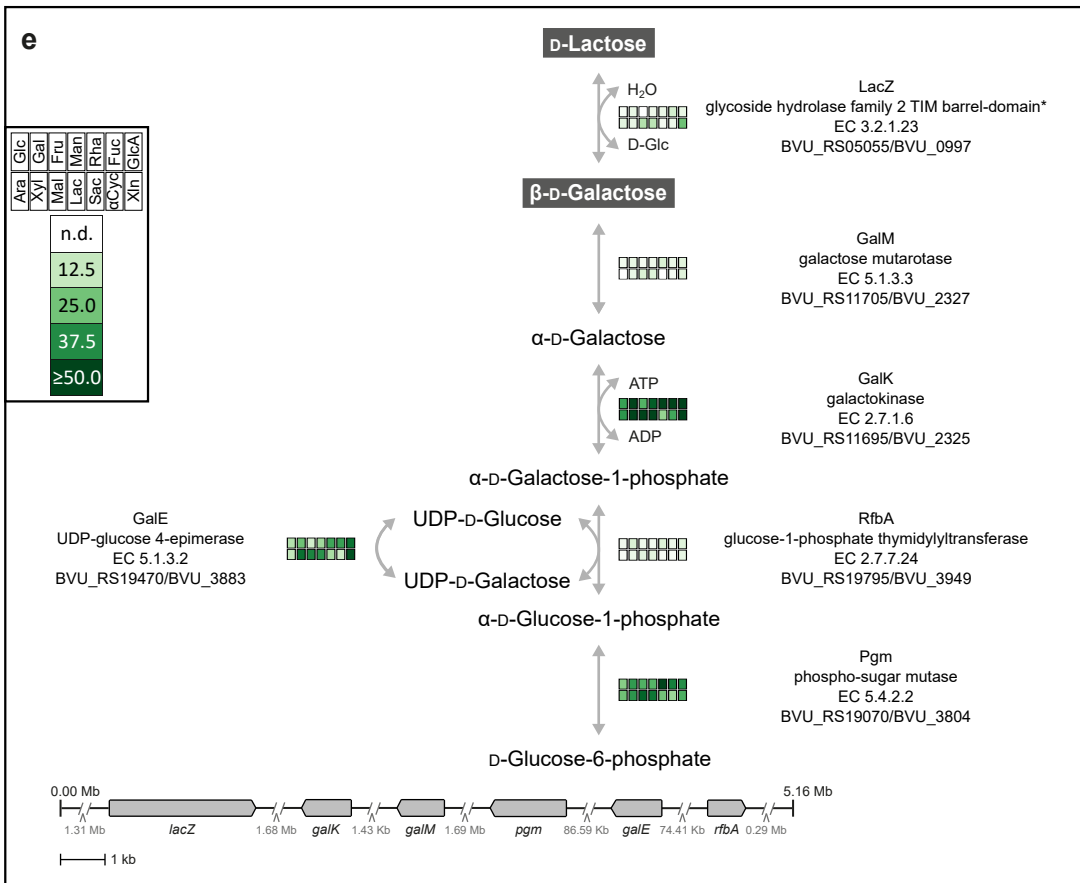

[illegible]

**g**

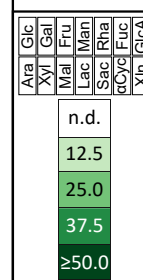

\* UxaB: slightly divergent functional prediction, specifically detected in glucuronate adapted cells;  
UxuB: fitting functional prediction, not specifically detected, lower peptide count

## h

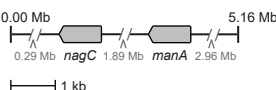

## i

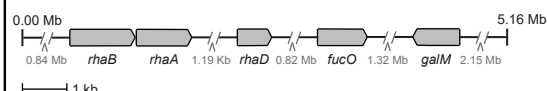

\* specific RhaM (BVU\_0150): genome predicted, but not detected

|      |      |
|------|------|
| Ara  | Glc  |
| Xyl  | Gal  |
| Mal  | Fru  |
| Lac  | Man  |
| Sac  | Rha  |
| αCyc | Fuc  |
| Xln  | GlcA |

  

|       |
|-------|
| n.d.  |
| 12.5  |
| 25.0  |
| 37.5  |
| ≥50.0 |

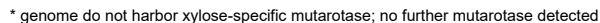

Supplement: Supplementary file 4 [file 1]
