# Supplementary material
Source: publisher figshare collection journal article supplement (https://karger.figshare.com/articles/dataset/_/25038494)
Supplement: Supplementary file 5 [file 1]

Table S4. Proteomic data of CAZymes in polysaccharide utilization loci.

| Modularity                     | Locus tag   | Locus tag old | Glc | Gal | Frc | Man | Rha | Fuc | GlcA | Ara | Xyl | Mal | Lac | Suc | αCyc | Xyn |
|--------------------------------|-------------|---------------|-----|-----|-----|-----|-----|-----|------|-----|-----|-----|-----|-----|------|-----|
| <b>PUL 1</b>                   |             |               |     |     |     |     |     |     |      |     |     |     |     |     |      |     |
| SusD_1                         | BVU_RS00195 | BVU_0037      | 0   | 0   | 0   | 0   | 0   | 0   | 0    | 0   | 0   | 0   | 0   | 0   | 0    | 356 |
| SusC_1                         | BVU_RS00200 | BVU_0038      | 0   | 0   | 0   | 0   | 0   | 21  | 0    | 0   | 0   | 0   | 0   | 0   | 0    | 943 |
| GH43_12(CBM91 ( <i>xynB</i> )) | BVU_RS00205 | BVU_0039      | 0   | 0   | 0   | 0   | 0   | 0   | 0    | 0   | 0   | 0   | 0   | 0   | 0    | 37  |
| GH43_12 ( <i>xynD</i> )        | BVU_RS00210 | BVU_0040      | 0   | 0   | 0   | 0   | 0   | 0   | 0    | 0   | 0   | 0   | 0   | 0   | 0    | 12  |
| GH10 ( <i>xynA</i> )           | BVU_RS00215 | BVU_0041      | 0   | 0   | 0   | 0   | 0   | 0   | 0    | 0   | 0   | 0   | 0   | 0   | 0    | 41  |
| MFS ( <i>xyn7</i> )            | BVU_RS00225 | BVU_0043      | 0   | 0   | 0   | 0   | 0   | 0   | 0    | 0   | 0   | 0   | 0   | 0   | 0    | 77  |
| <b>PUL 2</b>                   |             |               |     |     |     |     |     |     |      |     |     |     |     |     |      |     |
| unk                            | BVU_RS00495 | BVU_0097      | 5   | 63  | 73  | 57  | 37  | 3   | 37   | 47  | 4   | 7   | 67  | 6   | 43   | 3   |
| CE11                           | BVU_RS00500 | BVU_0098      | 28  | 35  | 25  | 35  | 32  | 36  | 47   | 37  | 29  | 34  | 42  | 50  | 56   | 30  |
| unk                            | BVU_RS00505 | BVU_0099      | 3   | 6   | 43  | 43  | 33  | 5   | 4    | 37  | 23  | 2   | 23  | 4   | 33   | 47  |
| unk                            | BVU_RS00510 | BVU_0100      | 23  | 3   | 67  | 27  | 53  | 8   | 73   | 47  | 0   | 0   | 0   | 37  | 47   | 6   |
| GH29                           | BVU_RS00520 | BVU_0102      | 0   | 0   | 0   | 0   | 5   | 4   | 3    | 0   | 1   | 6   | 5   | 0   | 0    | 6   |
| GH109                          | BVU_RS00535 | BVU_0105      | 0   | 0   | 0   | 0   | 3   | 0   | 0    | 0   | 0   | 13  | 0   | 0   | 0    | 0   |
| <b>PUL 3</b>                   |             |               |     |     |     |     |     |     |      |     |     |     |     |     |      |     |
| unk                            | BVU_RS00625 | BVU_0123      | 6   | 83  | 5   | 2   | 3   | 43  | 67   | 0   | 67  | 67  | 53  | 17  | 1    | 43  |
| SusD_3                         | BVU_RS00635 | BVU_0125      | 0   | 0   | 0   | 0   | 0   | 0   | 0    | 0   | 0   | 0   | 0   | 0   | 0    | 1   |
| SusC_3                         | BVU_RS00640 | BVU_0126      | 0   | 0   | 0   | 0   | 11  | 21  | 0    | 0   | 6   | 5   | 12  | 0   | 0    | 20  |
| <b>PUL 4</b>                   |             |               |     |     |     |     |     |     |      |     |     |     |     |     |      |     |
| GH3                            | BVU_RS00665 | BVU_0131      | 0   | 0   | 0   | 0   | 0   | 0   | 6    | 0   | 0   | 0   | 0   | 0   | 0    | 0   |
| GH92                           | BVU_RS00670 | BVU_0132      | 0   | 1   | 0   | 0   | 0   | 0   | 0    | 0   | 0   | 0   | 0   | 0   | 0    | 0   |
| SusC_4                         | BVU_RS00685 | BVU_0135      | 0   | 0   | 0   | 0   | 0   | 0   | 0    | 0   | 1   | 0   | 0   | 0   | 0    | 87  |
| <b>PUL 5</b>                   |             |               |     |     |     |     |     |     |      |     |     |     |     |     |      |     |
| SusC_5                         | BVU_RS00860 | BVU_0167      | 0   | 0   | 0   | 0   | 27  | 57  | 0    | 0   | 4   | 0   | 33  | 0   | 0    | 33  |
| <b>PUL 8</b>                   |             |               |     |     |     |     |     |     |      |     |     |     |     |     |      |     |
| SusC_8a                        | BVU_RS01525 | BVU_0299      | 0   | 0   | 0   | 0   | 0   | 13  | 0    | 0   | 0   | 0   | 0   | 0   | 0    | 0   |
| SusC_8b                        | BVU_RS01550 | BVU_0304      | 0   | 0   | 0   | 0   | 1   | 0   | 0    | 0   | 0   | 0   | 0   | 0   | 0    | 0   |
| <b>PUL 11</b>                  |             |               |     |     |     |     |     |     |      |     |     |     |     |     |      |     |
| SusC_11                        | BVU_RS01980 | BVU_0389      | 0   | 0   | 0   | 0   | 0   | 0   | 0    | 0   | 0   | 0   | 4   | 0   | 0    | 40  |
| SusD_11                        | BVU_RS01985 | BVU_0390      | 0   | 0   | 0   | 0   | 0   | 0   | 0    | 0   | 0   | 0   | 0   | 0   | 0    | 14  |
| GH2                            | BVU_RS02000 | BVU_0393      | 0   | 0   | 0   | 0   | 0   | 2   | 0    | 0   | 0   | 0   | 0   | 0   | 0    | 2   |
| Sulf_1                         | BVU_RS02005 | BVU_0394      | 0   | 0   | 0   | 0   | 0   | 0   | 0    | 0   | 0   | 0   | 0   | 0   | 1    | 1   |
| <b>PUL 12</b>                  |             |               |     |     |     |     |     |     |      |     |     |     |     |     |      |     |
| GH31_4                         | BVU_RS02515 | BVU_0491      | 0   | 0   | 0   | 0   | 0   | 2   | 0    | 0   | 0   | 0   | 0   | 0   | 0    | 3   |
| SusD_12a                       | BVU_RS02520 | BVU_0492      | 0   | 0   | 0   | 0   | 0   | 8   | 0    | 0   | 0   | 0   | 0   | 0   | 0    | 11  |
| SusC_12a                       | BVU_RS02525 | BVU_0492      | 0   | 0   | 0   | 0   | 0   | 8   | 0    | 0   | 0   | 0   | 0   | 0   | 0    | 11  |
| GH35                           | BVU_RS02535 | BVU_0495      | 0   | 0   | 0   | 0   | 0   | 4   | 0    | 0   | 0   | 0   | 0   | 0   | 0    | 12  |
| GH51_2                         | BVU_RS02540 | BVU_0496      | 0   | 0   | 0   | 0   | 0   | 1   | 0    | 0   | 0   | 0   | 0   | 0   | 0    | 4   |
| GH43_19/34                     | BVU_RS02545 | BVU_0497      | 0   | 0   | 0   | 0   | 0   | 0   | 0    | 0   | 0   | 0   | 0   | 0   | 0    | 6   |
| GH30_2                         | BVU_RS02550 | BVU_0498      | 0   | 0   | 0   | 0   | 0   | 0   | 0    | 0   | 0   | 0   | 0   | 0   | 0    | 12  |
| SusD_12b                       | BVU_RS02555 | BVU_0499      | 0   | 0   | 0   | 0   | 0   | 0   | 0    | 0   | 0   | 0   | 0   | 0   | 0    | 39  |
| SusC_12b                       | BVU_RS02560 | BVU_0500      | 0   | 0   | 0   | 0   | 0   | 0   | 0    | 0   | 0   | 0   | 0   | 0   | 0    | 163 |
| <b>PUL 13</b>                  |             |               |     |     |     |     |     |     |      |     |     |     |     |     |      |     |
| SusC_13                        | BVU_RS02580 | BVU_0505      | 0   | 3   | 0   | 0   | 31  | 103 | 0    | 0   | 33  | 27  | 38  | 0   | 0    | 75  |
| SusD_13                        | BVU_RS02585 | BVU_0506      | 0   | 0   | 0   | 0   | 12  | 56  | 0    | 0   | 8   | 21  | 15  | 0   | 0    | 32  |
| GH43_24                        | BVU_RS02595 | BVU_0508      | 0   | 0   | 0   | 0   | 0   | 2   | 0    | 0   | 0   | 0   | 0   | 0   | 0    | 0   |
| <b>PUL 14</b>                  |             |               |     |     |     |     |     |     |      |     |     |     |     |     |      |     |
| GH29                           | BVU_RS02725 | BVU_0535      | 5   | 8   | 6   | 7   | 4   | 7   | 11   | 5   | 5   | 10  | 9   | 3   | 2    | 9   |
| Sulf_1                         | BVU_RS02740 | BVU_0538      | 0   | 0   | 0   | 0   | 0   | 0   | 0    | 0   | 0   | 0   | 0   | 0   | 0    | 13  |
| <b>PUL 15</b>                  |             |               |     |     |     |     |     |     |      |     |     |     |     |     |      |     |
| GH92                           | BVU_RS02825 | BVU_0555      | 3   | 4   | 0   | 3   | 4   | 7   | 2    | 4   | 2   | 2   | 4   | 2   | 2    | 2   |
| SusD_15a                       | BVU_RS02845 | BVU_0560      | 0   | 0   | 0   | 0   | 6   | 50  | 0    | 0   | 0   | 1   | 37  | 0   | 0    | 0   |
| SusC_15a                       | BVU_RS02850 | BVU_0561      | 0   | 0   | 0   | 0   | 40  | 129 | 1    | 0   | 28  | 0   | 40  | 0   | 0    | 20  |
| SusD_15b                       | BVU_RS02855 | BVU_0562      | 6   | 7   | 10  | 12  | 54  | 44  | 19   | 3   | 27  | 51  | 32  | 7   | 8    | 28  |
| SusC_15b                       | BVU_RS02860 | BVU_0563      | 35  | 19  | 68  | 43  | 155 | 166 | 66   | 23  | 141 | 140 | 142 | 25  | 24   | 118 |
| <b>PUL 16</b>                  |             |               |     |     |     |     |     |     |      |     |     |     |     |     |      |     |
| SusC_16                        | BVU_RS02885 | BVU_0568      | 7   | 0   | 0   | 0   | 63  | 46  | 283  | 0   | 0   | 29  | 16  | 59  | 0    | 38  |
| SusD_16                        | BVU_RS02890 | BVU_0569      | 0   | 0   | 0   | 0   | 5   | 69  | 27   | 0   | 1   | 0   | 73  | 0   | 0    | 3   |
| <b>PUL 17</b>                  |             |               |     |     |     |     |     |     |      |     |     |     |     |     |      |     |
| SusC_17                        | BVU_RS02900 | BVU_0571      | 29  | 26  | 39  | 11  | 118 | 171 | 20   | 19  | 75  | 49  | 121 | 22  | 31   | 133 |
| SusD_17                        | BVU_RS02905 | BVU_0572      | 47  | 53  | 93  | 33  | 55  | 62  | 19   | 33  | 87  | 25  | 32  | 27  | 4    | 34  |
| <b>PUL 18</b>                  |             |               |     |     |     |     |     |     |      |     |     |     |     |     |      |     |
| SusC_18                        | BVU_RS02970 | BVU_0585      | 0   | 0   | 0   | 0   | 0   | 0   | 0    | 0   | 0   | 0   | 0   | 0   | 0    | 67  |
| <b>PUL 19</b>                  |             |               |     |     |     |     |     |     |      |     |     |     |     |     |      |     |
| GH2                            | BVU_RS03080 | BVU_0607      | 0   | 27  | 0   | 0   | 15  | 32  | 11   | 2   | 93  | 53  | 83  | 0   | 0    | 20  |
| <b>PUL 20</b>                  |             |               |     |     |     |     |     |     |      |     |     |     |     |     |      |     |
| GH130_2                        | BVU_RS03105 | BVU_0612      | 6   | 67  | 37  | 57  | 7   | 10  | 8    | 57  | 33  | 73  | 7   | 33  | 2    | 47  |
| unk                            | BVU_RS03120 | BVU_0615      | 0   | 43  | 0   | 13  | 13  | 16  | 0    | 0   | 8   | 77  | 7   | 0   | 0    | 83  |
| unk                            | BVU_RS03125 | BVU_0616      | 10  | 11  | 0   | 97  | 38  | 48  | 1    | 13  | 22  | 28  | 21  | 0   | 0    | 23  |
| GH18                           | BVU_RS03130 | BVU_0617      | 13  | 4   | 0   | 13  | 11  | 14  | 0    | 0   | 63  | 93  | 53  | 0   | 0    | 9   |
| SusD_20                        | BVU_RS03135 | BVU_0618      | 27  | 4   | 0   | 3   | 12  | 93  | 0    | 0   | 77  | 11  | 8   | 0   | 0    | 83  |
| SusC_20                        | BVU_RS03140 | BVU_0619      | 13  | 17  | 2   | 14  | 80  | 65  | 0    | 0   | 47  | 38  | 38  | 0   | 0    | 53  |
| unk                            | BVU_RS03150 | BVU_0621      | 0   | 3   | 33  | 0   | 13  | 3   | 0    | 0   | 3   | 27  | 3   | 0   | 0    | 27  |
| GH92                           | BVU_RS03170 | BVU_0624      | 0   | 37  | 0   | 6   | 11  | 17  | 13   | 2   | 13  | 13  | 16  | 0   | 0    | 18  |
| GH92                           | BVU_RS03175 | BVU_0625      | 0   | 0   | 0   | 0   | 1   | 1   | 0    | 0   | 0   | 1   | 0   | 0   | 0    | 0   |
| <b>PUL 21</b>                  |             |               |     |     |     |     |     |     |      |     |     |     |     |     |      |     |
| Anti-σ                         | BVU_RS03730 | BVU_0734      | 17  | 4   | 13  | 0   | 0   | 1   | 4    | 0   | 0   | 0   | 17  | 0   | 0    | 2   |
| <b>PUL 23</b>                  |             |               |     |     |     |     |     |     |      |     |     |     |     |     |      |     |
| SusC_23                        | BVU_RS03860 | BVU_0762      | 0   | 0   | 0   | 0   | 0   | 0   | 0    | 0   | 0   | 0   | 4   | 0   | 0    | 0   |
| <b>PUL 24</b>                  |             |               |     |     |     |     |     |     |      |     |     |     |     |     |      |     |
| unk                            | BVU_RS04265 | BVU_0840      | 0   | 0   | 0   | 0   | 0   | 0   | 0    | 0   | 0   | 0   | 0   | 0   | 0    | 1   |
| SusC_24                        | BVU_RS04270 | BVU_0841      | 0   | 0   | 0   | 0   | 0   | 0   | 0    | 0   | 0   | 0   | 0   | 0   | 0    | 11  |
| SusD_24                        | BVU_RS04275 | BVU_0842      | 0   | 0   | 0   | 0   | 0   | 0   | 0    | 0   | 0   | 0   | 0   | 0   | 0    | 1   |
| <b>PUL 25</b>                  |             |               |     |     |     |     |     |     |      |     |     |     |     |     |      |     |
| SusC_25                        | BVU_RS04805 | BVU_0946      | 0   | 0   | 0   | 0   | 24  | 26  | 0    | 0   | 31  | 16  | 48  | 0   | 0    | 71  |
| SusD_25                        | BVU_RS04810 | BVU_0947      | 0   | 0   | 0   | 0   | 0   | 13  | 0    | 0   | 0   | 0   | 0   | 0   | 0    | 83  |
| unk                            | BVU_RS04815 | BVU_0948      | 0   | 0   | 0   | 0   | 3   | 37  | 0    | 0   | 0   | 27  | 27  | 0   | 0    | 10  |
| Pept MA                        | BVU_RS04820 | BVU_0949      | 0   | 0   | 0   | 0   | 13  | 1   | 0    | 0   | 17  | 0   | 0   | 0   | 0    | 47  |
| <b>PUL 26</b>                  |             |               |     |     |     |     |     |     |      |     |     |     |     |     |      |     |
| SusC_26                        | BVU_RS04870 | BVU_0959      | 56  | 82  | 34  | 0   | 137 | 258 | 15   | 23  | 215 | 203 | 293 | 13  | 27   | 393 |
| SusD_26                        | BVU_RS04875 | BVU_0960      | 93  | 23  | 13  | 67  | 27  | 40  | 13   | 13  | 31  | 42  | 53  | 1   | 0    | 71  |
| <b>PUL 27</b>                  |             |               |     |     |     |     |     |     |      |     |     |     |     |     |      |     |
| GH2                            | BVU_RS05055 | BVU_0997      | 17  | 6   | 0   | 43  | 5   | 11  | 57   | 73  | 6   | 17  | 15  | 27  | 47   | 26  |
| GH51_2                         | BVU_RS05075 | BVU_1001      | 0   | 0   | 0   | 0   | 13  | 0   | 0    | 0   | 0   | 27  | 17  | 0   | 0    | 33  |
| <b>PUL 29</b>                  |             |               |     |     |     |     |     |     |      |     |     |     |     |     |      |     |
| SusC_29                        | BVU_RS05335 | BVU_1054      | 0   | 0   | 0   | 0   | 0   | 0   | 0    | 0   | 47  | 23  | 30  | 0   | 0    | 34  |
| SusD_29                        | BVU_RS05340 | BVU_1055      | 0   | 0   | 0   | 0   | 0   | 0   | 0    | 0   | 0   | 6   | 7   | 0   | 0    | 3   |
| <b>PUL 30</b>                  |             |               |     |     |     |     |     |     |      |     |     |     |     |     |      |     |
| SusC_30                        | BVU_RS05475 | BVU_1082      | 0   | 0   | 0   | 0   | 53  | 47  | 0    | 0   | 0   | 0   | 33  | 0   | 0    | 11  |
| SusD_30                        | BVU_RS05480 | BVU_1083      | 0   | 0   | 0   | 0   | 13  | 0   | 0    | 0   | 0   | 0   | 0   | 0   | 0    | 0   |
| <b>PUL 31</b>                  |             |               |     |     |     |     |     |     |      |     |     |     |     |     |      |     |
| unk                            | BVU_RS05640 | BVU_1115      | 47  | 47  | 87  | 11  | 0   | 27  | 77   | 11  | 37  | 17  | 3   | 11  | 8    | 33  |
| <b>PUL 34</b>                  |             |               |     |     |     |     |     |     |      |     |     |     |     |     |      |     |
| SusC_34                        | BVU_RS05850 | BVU_1157      | 0   | 0   | 0   | 0   | 0   | 0   | 0    | 0   | 2   | 0   | 37  | 0   | 0    | 15  |
| SusD_                          |             |               |     |     |     |     |     |     |      |     |     |     |     |     |      |     |

[illegible]
