# Supplementary material
Source: publisher figshare collection journal article supplement (https://karger.figshare.com/articles/dataset/_/25038494)
Supplement: Supplementary file 6 [file 1]

Table S5. List of substrate-related regulator and transporters and relevant proteomic data

| Growth substrate | (putative) transcriptional regulator |             |               |                  |                       | (putative) uptake system/transporter |             |               |                  |                       |
|------------------|--------------------------------------|-------------|---------------|------------------|-----------------------|--------------------------------------|-------------|---------------|------------------|-----------------------|
|                  | gene name                            | locus tag   | locus tag old | protein detected | evidence <sup>a</sup> | gene name                            | locus tag   | locus tag old | protein detected | evidence <sup>a</sup> |
| <b>Glc</b>       | malT                                 | BVU_RS02065 | BVU_0404      | +                | mb                    | glcT                                 | BVU_RS11700 | BVU_2326      | -                | PMID: 24330590        |
| <b>Gal</b>       | lacI                                 | BVU_RS04290 | BVU_0845      | -                | rp                    | glcT                                 | BVU_RS11700 | BVU_2326      | -                | PMID: 24330590        |
| <b>Frc</b>       | HTCS                                 | BVU_RS00765 | BVU_0149      | -                | rp                    | fruP                                 | BVU_RS08460 | BVU_1664      | +                | rp                    |
| <b>Man</b>       | fucR                                 | BVU_RS06955 | BVU_1374      | -                | PMID: 24330590        | fruP                                 | BVU_RS08460 | BVU_1664      | (+)              | PMID: 24330590        |
| <b>Rha</b>       | rhaR                                 | BVU_RS03065 | BVU_0604      | -                | PMID: 24291637        | rhaT                                 | BVU_RS03030 | BVU_0597      | -                | 24291637              |
| <b>Fuc</b>       | fucR                                 | BVU_RS06955 | BVU_1374      | -                | PMID: 24330590        | fucP                                 | BVU_RS06945 | BVU_1372      | +                | PMID: 24330590        |
| <b>GluA</b>      | kdgR                                 | BVU_RS15390 | BVU_3054      | +                | rp                    | hexT                                 | BVU_RS09105 | BVU_1794      | -                | PMID: 24330590        |
| <b>Ara</b>       | araR                                 | BVU_RS11680 | BVU_2322      | +                | PMID: 24330590        | araP                                 | BVU_RS11685 | BVU_2323      | +                | PMID: 24330590        |
| <b>Xyl</b>       | xylR                                 | BVU_RS19825 | BVU_3955      | +                | PMID: 24330590        | xylE                                 | BVU_RS20420 | BVU_4073      | (+)              | PMID: 24330590        |
| <b>Mal</b>       | malT                                 | BVU_RS02065 | BVU_0404      | (+)              | mb                    | malP                                 | BVU_RS07015 | BVU_1386      | -                | mb                    |
| <b>Lac</b>       | lacI                                 | BVU_RS04290 | BVU_0845      | -                | mb                    | lacY                                 | BVU_RS13155 | BVU_3613      | -                | mb                    |
| <b>Suc</b>       | HTCS                                 | BVU_RS00765 | BVU_0149      | -                | rp                    | susC                                 | BVU_RS08450 | BVU_1662      | +                | rp                    |
| <b>αCyc</b>      | susR                                 | BVU_RS07000 | BVU_1383      | -                | rp                    | susC_38                              | BVU_06985   | BVU_1380      | +                | PULDB/Proteomic       |
| <b>Xyn</b>       | susR                                 | BVU_RS07001 | BVU_1384      | -                | rp                    | xynT                                 | BVU_RS00225 | BVU_0043      | +                | mb                    |

<sup>a</sup> mb, manual blast (this study); rp, RegPrecise database entry
