# Supplementary material
Source: publisher figshare collection journal article supplement (https://karger.figshare.com/articles/dataset/_/25038494)
Supplement: Supplementary file 7 [file 1]

Table S1. Substrate-specific parameters:

Calculated growth parameters

| Growth substrate | Exponential growth phase (%OD <sub>max</sub> bis %OD <sub>max</sub> ) |                 |                      |                          |                           | Stationary phase (OD <sub>max</sub> ) |                                    |                                   |                  |
|------------------|-----------------------------------------------------------------------|-----------------|----------------------|--------------------------|---------------------------|---------------------------------------|------------------------------------|-----------------------------------|------------------|
|                  | doubling time                                                         | generation time | division rate        | growth rate (biomass)    | growth rate (cell count)  | biomass yield                         | normalized biomass yield           |                                   | space time yield |
|                  | [h]                                                                   | [h]             | [1 h <sup>-1</sup> ] | [g (L·h) <sup>-1</sup> ] | [1 (mL·h) <sup>-1</sup> ] |                                       | [g mM <sub>s</sub> <sup>-1</sup> ] | [g g <sub>s</sub> <sup>-1</sup> ] |                  |
| Glucose          | 1.60                                                                  | 1.33            | 0.75                 | 0.15                     | 1,48E+09                  | 0.06                                  | 0.011                              | 0.35                              | 0.09             |
| Galactose        | 2.30                                                                  | 1.61            | 0.62                 | 0.12                     | 1,31E+09                  | 0.06                                  | 0.010                              | 0.34                              | 0.08             |
| Fructose         | 1.57                                                                  | 1.22            | 0.82                 | 0.11                     | 8,48E+08                  | 0.05                                  | 0.008                              | 0.28                              | 0.08             |
| Mannose          | 1.69                                                                  | 1.54            | 0.65                 | 0.14                     | 1,12E+09                  | 0.06                                  | 0.010                              | 0.34                              | 0.10             |
| Rhamnose         | 3.67                                                                  | 3.20            | 0.31                 | 0.03                     | 3,25E+08                  | 0.03                                  | 0.006                              | 0.21                              | 0.02             |
| Fucose           | 8.80                                                                  | 10.23           | 0.10                 | 0.01                     | 1,19E+08                  | 0.01                                  | 0.002                              | 0.07                              | 0.01             |
| Glucuronate      | 14.26                                                                 | 18.29           | 0.05                 | 0.01                     | 1,64E+08                  | 0.03                                  | 0.005                              | 0.15                              | 0.01             |
| Arabinose        | 1.39                                                                  | 1.62            | 0.62                 | 0.19                     | 1,52E+09                  | 0.04                                  | 0.009                              | 0.29                              | 0.08             |
| Xylose           | 1.83                                                                  | 1.75            | 0.57                 | 0.14                     | 1,91E+09                  | 0.05                                  | 0.009                              | 0.30                              | 0.07             |
| Maltose          | 2.66                                                                  | 3.29            | 0.30                 | 0.11                     | 7,06E+08                  | 0.12                                  | 0.010                              | 0.36                              | 0.06             |
| Lactose          | 2.52                                                                  | 2.06            | 0.49                 | 0.07                     | 7,77E+08                  | 0.09                                  | 0.007                              | 0.26                              | 0.05             |
| Sucrose          | 2.29                                                                  | 1.60            | 0.63                 | 0.12                     | 1,22E+09                  | 0.09                                  | 0.008                              | 0.28                              | 0.06             |
| α-Cyclodextrin   | 1.74                                                                  | 1.21            | 0.83                 | 0.14                     | 1,89E+09                  | 0.27                                  | 0.007                              | 0.28                              | 0.07             |
| Xylan            | 4.57                                                                  | 3.39            | 0.29                 | 0.03                     | 6,50E+08                  | 0.14                                  | 0.004                              | 0.16                              | 0.02             |

Calculated fermentation product yield

| Growth substrate | Stationary phase (OD <sub>max</sub> ) |                                   |                                     |                                     |                                   |                                     |                                     |                                   |                                     |                                     |                                   |                                     |                                     |                                   |                                     |
|------------------|---------------------------------------|-----------------------------------|-------------------------------------|-------------------------------------|-----------------------------------|-------------------------------------|-------------------------------------|-----------------------------------|-------------------------------------|-------------------------------------|-----------------------------------|-------------------------------------|-------------------------------------|-----------------------------------|-------------------------------------|
|                  | Succinate                             |                                   |                                     | Propanoate                          |                                   |                                     | Acetate                             |                                   |                                     | Formate                             |                                   |                                     | Propane-1,2-diol                    |                                   |                                     |
|                  | [mM mM <sub>s</sub> <sup>-1</sup> ]   | [g g <sub>s</sub> <sup>-1</sup> ] | [g g <sub>sub</sub> <sup>-1</sup> ] | [mM mM <sub>s</sub> <sup>-1</sup> ] | [g g <sub>s</sub> <sup>-1</sup> ] | [g g <sub>sub</sub> <sup>-1</sup> ] | [mM mM <sub>s</sub> <sup>-1</sup> ] | [g g <sub>s</sub> <sup>-1</sup> ] | [g g <sub>sub</sub> <sup>-1</sup> ] | [mM mM <sub>s</sub> <sup>-1</sup> ] | [g g <sub>s</sub> <sup>-1</sup> ] | [g g <sub>sub</sub> <sup>-1</sup> ] | [mM mM <sub>s</sub> <sup>-1</sup> ] | [g g <sub>s</sub> <sup>-1</sup> ] | [g g <sub>sub</sub> <sup>-1</sup> ] |
| Glucose          | 0.39                                  | 0.26                              | 0.73                                | 0.01                                | 0.01                              | 0.02                                | 0.51                                | 0.33                              | 0.95                                | 0.16                                | 0.11                              | 0.20                                | n.d.                                | n.d.                              | n.d.                                |
| Galactose        | 0.31                                  | 0.21                              | 0.60                                | 0.01                                | 0.00                              | 0.01                                | 0.39                                | 0.13                              | 0.39                                | 0.06                                | 0.16                              | n.d.                                | n.d.                                | n.d.                              | n.d.                                |
| Fructose         | 0.36                                  | 0.24                              | 0.84                                | 0.00                                | 0.00                              | 0.01                                | 0.42                                | 0.28                              | 0.98                                | 0.14                                | 0.09                              | 0.20                                | n.d.                                | n.d.                              | n.d.                                |
| Mannose          | 0.34                                  | 0.22                              | 0.67                                | 0.01                                | 0.00                              | 0.01                                | 0.41                                | 0.27                              | 0.81                                | 0.15                                | 0.10                              | 0.19                                | n.d.                                | n.d.                              | n.d.                                |
| Rhamnose         | 0.03                                  | 0.02                              | 0.10                                | d.                                  | d.                                | d.                                  | 0.50                                | 0.36                              | 1.71                                | 0.03                                | 0.02                              | 0.07                                | 1.03                                | 0.48                              | 2.26                                |
| Fucose           | 0.15                                  | 0.11                              | 1.48                                | 0.02                                | 0.01                              | 0.17                                | 0.31                                | 0.22                              | 3.01                                | 0.02                                | 0.01                              | 0.10                                | 0.40                                | 0.19                              | 2.55                                |
| Glucuronate      | 0.03                                  | 0.02                              | 0.12                                | 0.01                                | 0.01                              | 0.04                                | 0.94                                | 0.57                              | 3.69                                | d.                                  | d.                                | d.                                  | n.d.                                | n.d.                              | n.d.                                |
| Arabinose        | 0.34                                  | 0.27                              | 0.91                                | d.                                  | d.                                | 0.00                                | 0.42                                | 0.33                              | 1.12                                | 0.11                                | 0.09                              | 0.19                                | n.d.                                | n.d.                              | n.d.                                |
| Xylose           | 0.36                                  | 0.28                              | 1.06                                | 0.02                                | 0.02                              | 0.06                                | 0.34                                | 0.26                              | 0.99                                | 0.00                                | 0.00                              | 0.00                                | n.d.                                | n.d.                              | n.d.                                |
| Maltose          | 0.56                                  | 0.19                              | 0.53                                | 0.08                                | 0.03                              | 0.08                                | 0.58                                | 0.20                              | 0.55                                | 0.03                                | 0.01                              | 0.02                                | n.d.                                | n.d.                              | n.d.                                |
| Lactose          | 0.68                                  | 0.24                              | 0.90                                | 0.08                                | 0.03                              | 0.10                                | 0.66                                | 0.23                              | 0.87                                | 0.05                                | 0.02                              | 0.05                                | n.d.                                | n.d.                              | n.d.                                |
| Sucrose          | 0.86                                  | 0.30                              | 1.08                                | d.                                  | d.                                | d.                                  | 1.01                                | 0.35                              | 1.25                                | 0.36                                | 0.13                              | 0.29                                | n.d.                                | n.d.                              | n.d.                                |
| α-Cyclodextrin   | 1.90                                  | 0.23                              | 0.84                                | 0.12                                | 0.02                              | 0.05                                | 1.88                                | 0.23                              | 0.83                                | 0.47                                | 0.06                              | 0.13                                | n.d.                                | n.d.                              | n.d.                                |
| Xylan            | 1.01                                  | 0.13                              | 0.86                                | 0.51                                | 0.07                              | 0.43                                | 2.13                                | 0.28                              | 1.80                                | 1.37                                | 0.18                              | 0.75                                | n.d.                                | n.d.                              | n.d.                                |

Carbon balance of the degradation pathways

| Growth substrate | substrate depletion [mM C] | product formation [mM C] | biomass formation [mM C] | CO <sub>2</sub> /HCO <sub>3</sub> <sup>-</sup> formation [mM C] | sum [mM C] | closure [%] |
|------------------|----------------------------|--------------------------|--------------------------|-----------------------------------------------------------------|------------|-------------|
| Glucose          | 77.1                       | 41.53                    | 38.92                    | -0.54                                                           | 79.91      | 96.36       |
| Galactose        | 67.2                       | 40.52                    | 31.31                    | -0.59                                                           | 71.24      | 93.99       |
| Fructose         | 70.68                      | 33.99                    | 35.01                    | -1.05                                                           | 67.95      | 96.14       |
| Mannose          | 71.52                      | 39.27                    | 32.97                    | -1.06                                                           | 71.18      | 99.53       |
| Rhamnose         | 62.22                      | 17.14                    | 41.31                    | -5.48                                                           | 52.97      | 85.13       |
| Fucose           | 51.6                       | 6.63                     | 33.12                    | 2.09                                                            | 41.84      | 81.08       |
| Arabinose        | 71.99                      | 33.17                    | 37.18                    | -0.46                                                           | 69.89      | 97.09       |
| Xylose           | 73.69                      | 31.25                    | 36.35                    | -0.07                                                           | 67.53      | 91.64       |
| Maltose          | 75.84                      | 41.67                    | 26.42                    | 0.54                                                            | 68.63      | 90.49       |
| Lactose          | 72.96                      | 28.71                    | 30.04                    | 0.03                                                            | 58.78      | 80.56       |
| Sucrose          | 85.92                      | 31.3                     | 41.85                    | -1.59                                                           | 71.56      | 83.29       |

Ratio of product formation for ATP yield calculation

| Growth substrate | Exponential phase (%OD <sub>max</sub> ) |            |                      |                                  |
|------------------|-----------------------------------------|------------|----------------------|----------------------------------|
|                  | Succinate                               | Propanoate | Acetate <sup>1</sup> | Acetate via Formate <sup>2</sup> |
|                  | [%]                                     | [%]        | [%]                  | [%pt.]                           |
| Glucose          | 35.69                                   | 1.60       | 61.24                | 26.95                            |
| Galactose        | 55.63                                   | 2.70       | 39.34                | 22.83                            |
| Fructose         | 40.56                                   | 0.62       | 56.66                | 26.55                            |
| Mannose          | 44.02                                   | 0.75       | 52.99                | 19.46                            |
| Rhamnose         | 6.33                                    | 0.00       | 93.67                | 9.67                             |
| Fucose           | 38.85                                   | 4.08       | 56.44                | 4.28                             |
| Glucuronate      | 2.55                                    | 0.82       | 96.60                | 0.00                             |
| Arabinose        | 39.96                                   | 0.00       | 59.02                | 19.56                            |
| Xylose           | 46.99                                   | 4.63       | 47.05                | 3.03                             |
| Maltose          | 43.24                                   | 8.19       | 47.35                | 10.31                            |
| Lactose          | 45.69                                   | 7.82       | 45.58                | 6.80                             |
| Sucrose          | 39.91                                   | 0.00       | 58.53                | 26.65                            |
| α-Cyclodextrin   | 46.04                                   | 4.87       | 48.10                | 15.83                            |
| Xylan            | 33.26                                   | 12.52      | 54.21                | 16.26                            |

<sup>1</sup> sum of acetate via PiIB and Pio

<sup>2</sup> share of acetate produced via PiIB
