# Supplementary material
Source: publisher figshare collection journal article supplement (https://karger.figshare.com/articles/dataset/_/25038494)
Supplement: Supplementary file 8 [file 1]

| Locus tag                                         | Subunit | Glc | Gal | Fru | Man | Rha | Fuc | GlcA | Ara | Xyl | Mal | Lac | Suc | αCyc | Xln |
|---------------------------------------------------|---------|-----|-----|-----|-----|-----|-----|------|-----|-----|-----|-----|-----|------|-----|
| <b>F-type ATP synthase</b>                        |         |     |     |     |     |     |     |      |     |     |     |     |     |      |     |
| BVU_RS15090                                       | β       | 36  | 41  | 32  | 32  | 31  | 17  | 28   | 30  | 23  | 35  | 32  | 36  | 25   | 19  |
| BVU_RS15095                                       | ε       |     |     | 1   |     |     |     |      |     |     |     |     | 1   | 1    | 1   |
| BVU_RS15105                                       | A       |     |     |     |     |     |     |      |     |     |     |     |     |      |     |
| BVU_RS15110                                       | C       | 27  | 30  | 12  | 9   | 9   | 8   | 20   | 23  | 8   | 6   | 7   | 41  | 26   | 8   |
| BVU_RS15115                                       | B       | 27  | 36  | 30  | 18  | 17  | 33  | 25   | 19  | 24  | 18  | 20  | 30  | 12   | 14  |
| BVU_RS15120                                       | δ       |     | 4   | 2   | 5   | 5   | 6   | 3    | 4   |     | 4   | 2   | 7   | 4    |     |
| BVU_RS15125                                       | α       | 15  | 21  | 19  | 16  | 11  | 14  | 22   | 18  | 13  | 11  | 14  | 17  | 7    | 8   |
| BVU_RS15130                                       | γ       |     | 2   |     | 2   |     |     |      |     |     | 1   |     | 2   |      |     |
| <b>V-type ATP synthase</b>                        |         |     |     |     |     |     |     |      |     |     |     |     |     |      |     |
| BVU_RS17890                                       | a       |     |     |     | 1   |     | 2   |      | 1   |     |     |     |     | 2    |     |
| BVU_RS17895                                       | D       | 1   | 7   |     | 3   |     |     | 1    | 1   | 3   |     | 3   |     | 1    | 1   |
| BVU_RS17900                                       | B       | 4   | 6   | 1   | 3   | 7   | 4   | 6    | 4   | 2   | 7   | 5   | 1   | 2    | 4   |
| BVU_RS17905                                       | A       |     | 2   |     | 4   | 6   | 10  | 7    | 3   | 3   | 6   | 4   |     | 2    | 4   |
| BVU_RS17915                                       | E       | 13  | 17  | 16  | 15  | 26  | 10  | 20   | 6   | 19  | 24  | 20  | 7   | 6    | 16  |
| BVU_RS17885                                       | c       |     |     |     |     |     |     |      |     |     |     |     |     |      |     |
| <b>Rnf-complex</b>                                |         |     |     |     |     |     |     |      |     |     |     |     |     |      |     |
| BVU_RS19480                                       | RnfA    |     |     |     |     |     |     |      |     |     |     |     |     |      |     |
| BVU_RS19485                                       | RnfE    |     |     |     |     |     |     |      |     |     |     |     |     |      |     |
| BVU_RS19490                                       | RnfG    |     |     |     |     | 3   | 1   | 1    |     |     |     |     |     |      |     |
| BVU_RS19495                                       | RnfD    |     |     |     |     | 5   | 4   |      |     |     |     |     |     |      |     |
| BVU_RS19500                                       | RnfC    | 6   | 7   | 3   |     | 43  | 40  |      | 7   | 10  | 13  | 16  |     |      | 15  |
| BVU_RS19505                                       | RnfB    | 1   | 3   | 2   | 3   | 33  | 27  | 4    | 3   | 7   | 9   | 12  | 1   | 2    | 9   |
| <b>Frd-complex</b>                                |         |     |     |     |     |     |     |      |     |     |     |     |     |      |     |
| BVU_RS06270                                       | FrdA    | 121 | 130 | 80  | 131 | 47  | 73  | 131  | 131 | 57  | 104 | 95  | 115 | 98   | 51  |
| BVU_RS06275                                       | FrdB    | 35  | 53  | 22  | 23  | 21  | 21  | 16   | 26  | 20  | 20  | 23  | 24  | 14   | 23  |
| BVU_RS06265                                       | FrdC    | 16  | 14  | 16  | 24  | 9   | 19  | 24   | 28  | 15  | 10  | 11  | 20  | 22   | 21  |
| <b>NADH-ubiquinone reductase (Nqr-complex)</b>    |         |     |     |     |     |     |     |      |     |     |     |     |     |      |     |
| BVU_RS16270                                       | A       | 23  | 36  | 25  | 38  | 12  | 22  | 19   | 27  | 15  | 18  | 24  | 23  | 22   | 16  |
| BVU_RS16275                                       | B       | 49  | 19  | 38  | 52  | 15  | 30  | 18   | 40  | 37  | 23  | 25  | 22  | 26   | 49  |
| BVU_RS16280                                       | C       | 16  | 18  | 21  | 33  | 13  | 18  | 27   | 29  | 16  | 13  | 16  | 26  | 16   | 17  |
| BVU_RS16285                                       | D       |     |     |     |     |     |     |      |     |     |     |     |     |      | 1   |
| BVU_RS16290                                       | E       |     |     |     | 3   |     | 2   |      | 4   |     |     |     | 2   |      |     |
| BVU_RS16295                                       | F       | 21  | 22  | 26  | 44  | 12  | 22  | 41   | 47  | 26  | 21  | 24  | 47  | 26   | 20  |
| <b>NADH-quinone oxidoreductase (NDHI-complex)</b> |         |     |     |     |     |     |     |      |     |     |     |     |     |      |     |
| BVU_RS08895                                       | NuoN    |     |     |     |     |     |     |      |     |     |     |     |     |      |     |
| BVU_RS08900                                       | NuoM    |     |     |     |     |     |     |      |     |     |     |     |     |      |     |
| BVU_RS08905                                       | NuoL    |     |     |     |     |     |     |      |     |     |     |     |     |      |     |
| BVU_RS08910                                       | NuoK    |     |     |     |     |     |     |      |     |     |     |     |     |      |     |
| BVU_RS08915                                       | NuoJ    |     |     |     |     |     |     |      |     |     |     |     |     |      |     |
| BVU_RS08920                                       | NuoI    |     |     |     |     |     |     |      |     |     |     |     |     |      |     |
| BVU_RS08925                                       | NuoH    |     |     |     |     |     |     |      |     |     |     |     |     |      |     |
| BVU_RS08930                                       | NuoD    |     |     |     |     |     |     |      |     |     |     |     |     |      |     |
| BVU_RS08935                                       | NuoB    |     |     |     |     |     |     |      |     |     |     |     | 1   |      |     |
| BVU_RS08940                                       | NuoA    |     |     |     |     |     |     |      |     |     |     |     |     |      |     |

|                |
|----------------|
| Peptide count: |
| n.d.           |
| 12.5           |
| 25.0           |
| 37.5           |
| ≥50.0          |

**Fig. S3.** Differential protein profiles of respiratory complexes in *P. vulgatus*.
